# Supplementary material for: 4,4′-Diaponeurosporene from Lactobacillus plantarum subsp. plantarum KCCP11226: Low Temperature Stress-Induced Production Enhancement and In Vitro Antioxidant Activity
Source: PubMed Central journal article supplement (PMC9706005; doi:10.4014/jmb.2010.10022), 2020-11-04
Supplement: jmb-31-1-63-supple.pdf [file jmb-31-1-63-supple.pdf]

**Table S1. Antibiotic resistance profiles of *Lactobacillus plantarum* subsp. *plantarum* KCCP11226**

| Strain                                                      | Antibiotics      |                  |                  |                  |                  |                  |                  |                    |
|-------------------------------------------------------------|------------------|------------------|------------------|------------------|------------------|------------------|------------------|--------------------|
|                                                             | Amp <sup>a</sup> | Ery <sup>b</sup> | Gen <sup>c</sup> | Cip <sup>d</sup> | Lin <sup>e</sup> | Nov <sup>f</sup> | Tet <sup>g</sup> | Strep <sup>h</sup> |
| <i>L. plantarum</i><br>subsp. <i>plantarum</i><br>KCCP11226 | S                | R                | R                | R                | R                | S                | R                | R                  |

S, sensitive; R, resistant

<sup>a</sup>Ampicillin; <sup>b</sup>Erythromycin; <sup>c</sup>Gentamicin; <sup>d</sup>Ciprofloxacin; <sup>e</sup>Lincomycin; <sup>f</sup>Novobiocin; <sup>g</sup>Tetracycline;

<sup>h</sup>Streptomycin

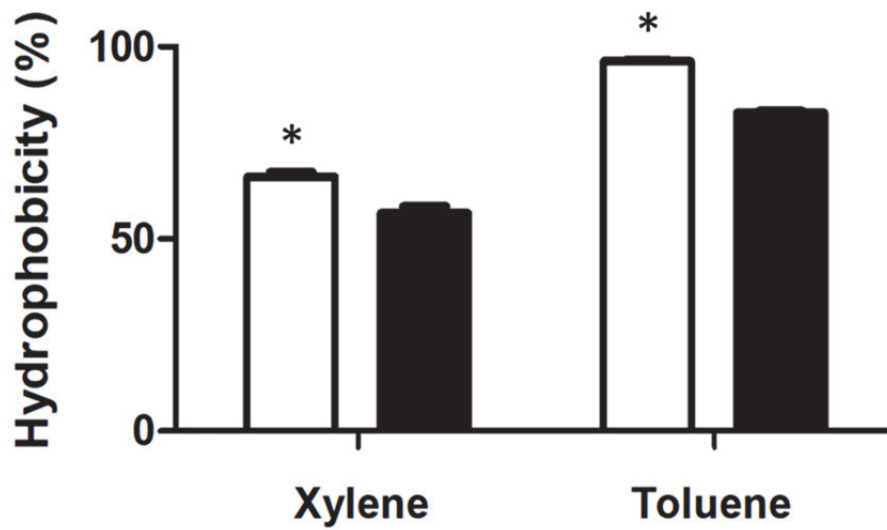

**Fig. S1. Hydrophobicity against xylene and toluene.** White and black bars indicate *L. plantarum* subsp. *plantarum* KCCP11226 and *L. rhamnosus* GG, respectively. The results from three independent test are represent as means  $\pm$  SD. Significant means were expressed after analysis of variance (ANOVA) analysis with Tukey-Kramer multiple comparison tests ( $*p < 0.01$ ).
